# Supplementary material
Source: MDPI journal article supplement (https://www.mdpi.com/2073-4395/13/5/1268)
Supplement: s1 [file s1]

## Supplementary Materials

# Variations in Methanogenic and Methanotrophic Communities Resulted in Different Methane Emissions from Paddy Soil Applied with Two Types of Manure

Beibei Zhou <sup>1,2</sup>, Ruirui Chen <sup>2</sup>, Shuang Peng <sup>1,2</sup>, Jianwei Zhang <sup>2</sup>, Xiangui Lin <sup>2</sup> and Yiming Wang <sup>2,\*</sup>

<sup>1</sup> Jiangsu Open University, School of Environment and Ecology, Nanjing 210017, China

<sup>2</sup> State Key Laboratory of Soil and Sustainable Agriculture, Institute of Soil Science, Chinese Academy of Sciences, Nanjing 210008, China

\* Correspondence: ymwang@issas.ac.cn

**Table S1.** Statistic results of contrasting NCM and RCM, respectively, with control on five sampling days based on t-test.

| CH <sub>4</sub> emission increase (%) | Stage1 |      |      |        |      |      | Stage2 |      |       |      |
|---------------------------------------|--------|------|------|--------|------|------|--------|------|-------|------|
|                                       | NCM    |      |      | RCM    |      |      | NCM    |      | RCM   |      |
|                                       | 279.4% | ↑ ** |      | 120.8% | ↑ *  |      | 132.8% | ↑ *  | 95.1% | ↓ *  |
| Soil properties                       | 7d     | 21d  | 39d  | 7d     | 21d  | 39d  | 90d    | 133d | 90d   | 133d |
| DOC                                   | ↑ **   | ↑ ** | ↑ ** | ↑ **   | ↑ ** | ↑ ** | ↑ **   | ↑ ** | n.s.  | n.s. |
| Methanogen amount                     | ↑ *    | ↑ *  | ↑ *  | n.s.   | ↓ ** | n.s. | ↑ *    | n.s. | n.s.  | n.s. |
| <i>Methanosarcina</i> abundance       | ↑ **   | ↑ ** | ↑ ** | n.s.   | n.s. | n.s. | ↑ *    | ↑ *  | ↑ *   | n.s. |
| NH <sub>4</sub> <sup>+</sup>          | ↑ **   | ↑ ** | ↑ *  | ↑ **   | ↑ ** | ↑ ** | n.s.   | ↑ ** | ↑ **  | ↑ *  |
| NO <sub>3</sub> <sup>-</sup>          | ↑ **   | n.s. | ↑ ** | ↑ **   | n.s. | ↑ ** | n.s.   | n.s. | n.s.  | ↑ ** |
| SO <sub>4</sub> <sup>2-</sup>         | n.s.   | n.s. | n.s. | ↑ **   | ↑ ** | ↑ *  | n.s.   | n.s. | ↑ **  | ↑ ** |
| Methanotroph amount                   | n.s.   | ↓ *  | ↑ *  | n.s.   | ↓ ** | n.s. | n.s.   | ↑ ** | ↑ *   | n.s. |
| <i>dsr</i> genes amount               | ↑ **   | ↑ ** | n.s. | ↑ *    | n.s. | n.s. | n.s.   | ↑ ** | ↑ *   | ↑ *  |
| <i>Methylophilaceae</i> abundance     | n.s.   | —    | n.s. | n.s.   | —    | n.s. | —      | n.s. | —     | ↑ ** |

n.s., not significant; \*\*, significant at  $p < 0.01$ ; \*, significant at  $p < 0.05$ . NCM, non-composted manure; RCM, composted manure; Ctrl, control, with no manure incorporated.

**Table S2.** Effects of different treatments on rice biomass.

| Dry matter (g/pot) | Ctrl           | NCM            | RCM            |
|--------------------|----------------|----------------|----------------|
| Straw              | 31.63 ± 3.38 c | 40.16 ± 3.17 b | 54.67 ± 2.63 a |
| Grain              | 34.14 ± 2.67 c | 38.38 ± 1.13 b | 53.24 ± 1.22 a |
| Root               | 3.96 ± 0.36 b  | 7.33 ± 0.17 a  | 7.05 ± 0.21 a  |
